# Supplementary material for: The Evolutionary Pattern of Glycosylation Sites in Influenza Virus (H5N1) Hemagglutinin and Neuraminidase
Source: PLoS One. 2012 Nov 1;7(11):e49224. doi: 10.1371/journal.pone.0049224 (PMC3486865; doi:10.1371/journal.pone.0049224)
Supplement: File S1 — The analytic alignment file of 146 representative HA and 93 representative NA sequences. (XLSX) [file pone.0049224.s003.xlsx]

## Sheet: Sheet1
H1
A/Alagoas/96/2010(H1N1)-566AA	-	-	-	-	-	-	-	-	-	M	K	A	I	L	V	V	L	L	Y	T	F	A	T	A	N	A	D	T	L	C	I	G	Y	H	A	N	N	S	T	D	T	V	D	T	V	L	E	K	N
A/New York/400/2003(H1N2)	-	-	-	-	-	-	-	-	-	M	K	V	K	L	L	I	L	L	C	T	F	T	A	T	Y	A	D	T	I	C	I	G	Y	H	A	N	N	S	T	D	T	V	D	T	V	L	E	K	N
A/mallard/Alberta/42/1977(H1N6)	-	-	-	-	-	-	-	-	-	M	E	A	K	L	F	V	L	F	C	T	F	T	V	L	K	A	D	T	I	C	V	G	Y	H	A	N	N	S	T	D	T	V	D	T	V	L	E	K	N
A/pintail duck/ALB/219/1977(H1N1)	-	-	-	-	-	-	-	-	-	M	E	A	K	L	F	V	L	F	C	T	F	T	V	L	K	A	D	T	I	C	V	G	Y	H	A	N	N	S	T	D	T	V	D	T	V	L	E	K	N
A/swine/Spain/51915/2003 2003// HA H1N1	-	-	-	-	-	-	-	-	-	M	E	A	K	M	F	V	L	F	C	A	F	T	A	L	K	A	D	T	I	C	V	G	Y	H	A	N	N	S	T	D	T	V	D	T	I	L	E	K	N
A/South Carolina/1/1918(H1N1)	-	-	-	-	-	-	-	-	-	M	E	A	R	L	L	V	L	L	C	A	F	A	A	T	N	A	D	T	I	C	I	G	Y	H	A	N	N	S	T	D	T	V	D	T	V	L	E	K	N
A/Puerto Rico/8-SV14/1934(H1N1)	-	-	-	-	-	-	-	-	-	M	K	A	N	L	L	V	L	L	C	A	L	A	A	A	D	A	D	T	I	C	I	G	Y	H	A	N	N	S	T	D	T	V	D	T	V	L	E	K	N
A/South Australia/46/2000(H1N1)	-	-	-	-	-	-	-	-	-	M	K	A	K	L	L	V	L	L	C	A	F	T	A	T	Y	A	D	T	I	C	I	G	Y	H	A	N	N	S	T	D	T	V	D	T	V	L	E	K	N
A/Memphis/20/1983(H1N1)	-	-	-	-	-	-	-	-	-	M	K	A	K	L	L	V	L	L	C	A	L	S	A	T	D	A	D	T	I	C	I	G	Y	H	A	N	N	S	T	D	T	V	D	T	V	L	E	K	N
A/mallard/Ohio/265/1987 1987(H1N9)	-	-	-	-	-	-	-	-	-	M	E	A	K	L	F	V	L	F	C	T	F	T	V	L	K	A	D	T	I	C	V	G	Y	H	A	N	N	S	T	D	T	V	D	T	V	L	E	K	N
H2
A/Japan/305/1957(H2N2)-562AA	-	-	-	-	-	-	-	-	-	-	-	M	A	I	I	Y	L	I	L	L	F	T	A	V	R	G	D	Q	I	C	I	G	Y	H	A	N	N	S	T	E	K	V	D	T	N	L	E	R	N
A/RI/5-/1957(H2N2)	-	-	-	-	-	-	-	-	-	-	-	M	A	I	I	Y	L	I	L	L	F	T	A	V	R	G	D	Q	I	C	I	G	Y	H	A	N	N	S	T	E	K	V	D	T	I	L	E	R	N
A/Singapore/1/1957(H2N2)	-	-	-	-	-	-	-	-	-	-	-	M	A	I	I	Y	L	I	L	L	F	T	A	V	R	G	D	Q	I	C	I	G	Y	H	A	N	N	S	T	E	K	V	D	T	I	L	E	R	N
A/mallard/Alberta/353/1988(H2N3)	-	-	-	-	-	-	-	-	-	-	-	M	T	I	T	F	L	I	L	L	F	T	V	V	K	G	D	Q	I	C	I	G	Y	H	A	N	N	S	T	E	K	V	D	T	I	L	E	R	N
A/Berkeley/1/1968(H2N2)	-	-	-	-	-	-	-	-	-	-	-	M	A	I	I	Y	L	I	L	L	F	T	A	V	R	G	D	Q	I	C	I	G	Y	H	A	N	N	S	T	E	K	V	D	T	I	L	E	R	N
A/Berlin/3/1964(H2N2)	-	-	-	-	-	-	-	-	-	-	-	M	A	I	I	Y	L	I	L	L	F	T	A	V	R	G	D	Q	I	C	I	G	Y	H	A	N	N	S	T	E	K	V	D	T	I	L	E	R	N
A/herring gull/DE/677/1988(H2N8)	-	-	-	-	-	-	-	-	-	-	-	M	A	I	I	Y	L	I	L	L	F	T	A	V	R	G	D	Q	I	C	I	G	Y	H	S	N	N	S	T	E	K	V	D	T	I	L	E	R	N
A/duck/Germany/1972(H2N9)	-	-	-	-	-	-	-	-	-	-	-	M	A	I	I	Y	L	I	L	L	F	T	A	V	K	G	D	Q	I	C	I	G	Y	H	S	N	N	S	T	E	K	V	D	T	I	L	E	R	N
A/duck/Hong Kong/273/78(H2N2)	-	-	-	-	-	-	-	-	-	-	-	M	A	I	I	Y	L	I	L	L	L	T	V	V	K	G	D	Q	I	C	I	G	Y	H	A	N	N	S	T	E	T	V	D	T	I	L	E	R	N
A/Korea/426/1968(H2N2)	-	-	-	-	-	-	-	-	-	-	-	M	A	I	I	Y	L	I	L	L	F	T	A	V	R	G	D	Q	I	C	I	G	Y	H	A	N	N	S	T	E	K	V	D	T	I	L	E	R	N
H3
A/Aichi/2/1968(H3N2)--562AA	M	K	T	I	I	A	L	S	Y	I	F	C	L	P	L	G	Q	D	L	P	G	N	D	N	S	T	A	T	L	C	L	G	H	H	A	V	P	N	G	T	L	V	K	T	I	T	D	D	Q
A/Georgia/01/2008(H3N2)	M	K	T	I	I	A	L	S	Y	I	L	C	L	V	F	A	Q	K	L	P	G	N	D	N	S	T	A	T	L	C	L	G	H	H	A	V	P	N	G	T	I	V	K	T	I	T	N	D	Q
A/Guangdong/30/2007(H3N2)	M	K	T	I	I	A	L	S	Y	I	L	C	L	V	F	A	Q	K	L	P	G	N	D	N	S	T	A	T	L	C	L	G	H	H	A	V	P	N	G	T	I	V	K	T	I	T	N	D	Q
A/Canterbury/26/2005(H3N2)	M	K	T	I	I	A	L	S	Y	I	L	C	L	I	F	A	Q	K	L	P	G	N	D	N	S	T	A	T	L	C	L	G	H	H	A	V	P	N	G	T	I	V	K	T	I	T	N	D	Q
A/swine/Chonburi/05CB2/2005(H3N2)	M	K	T	I	I	V	L	S	Y	I	F	C	L	A	L	G	Q	E	Y	S	R	N	G	D	S	M	A	T	L	C	L	G	H	H	A	V	Q	N	G	T	L	V	K	T	I	T	N	D	Q
A/swine/Ratchaburi/NIAH9426/2005(H3N2)	M	K	T	I	I	A	V	S	N	I	L	C	L	V	F	A	Q	K	L	P	G	N	D	N	T	T	A	T	L	C	L	G	H	H	A	V	P	N	G	T	L	V	K	T	L	T	D	D	Q
A/Albany/6/1970(H3N2)	M	K	T	I	I	A	L	S	Y	I	L	C	L	V	F	A	Q	K	L	P	G	N	D	N	T	T	A	T	L	C	L	G	H	H	A	V	P	N	G	T	L	V	K	T	I	T	D	D	Q
A/swine/Nakhon pathom/NIAH586-2/2005(H3N2)	M	K	T	I	I	A	L	S	Y	I	F	C	L	A	L	G	Q	E	Y	S	R	N	G	D	S	M	A	T	L	C	L	G	H	H	A	V	Q	N	G	T	L	V	K	T	I	T	N	D	Q
A/Albany/6/1970(H3N2)(H3N2)	M	K	T	I	I	A	L	S	Y	I	F	C	L	T	L	G	Q	E	Y	S	R	N	G	D	S	M	A	T	L	C	L	G	H	H	A	V	Q	N	G	T	L	V	K	T	I	T	N	D	Q
A/Acre/26954/2010(H3N2)	M	K	T	I	I	A	L	S	Y	I	L	C	L	V	F	A	Q	K	L	P	G	N	D	N	S	T	A	T	L	C	L	G	H	H	A	V	P	N	G	T	I	V	K	T	I	T	N	D	Q
H4
A/blue-winged teal/Minnesota/Sg-00040/2007(H4N6)-564AA	-	-	-	-	M	L	S	I	T	I	L	F	L	L	I	A	E	V	S	S	Q	N	Y	T	G	N	P	V	I	C	L	G	H	H	A	V	P	N	G	T	M	V	K	T	L	T	D	D	Q
A/canvasback duck/ALB/274/1977(H4N6)	-	-	-	-	M	L	S	I	T	I	L	F	L	L	I	A	E	G	S	S	Q	N	Y	T	G	N	P	V	I	C	L	G	H	H	A	V	S	N	G	T	M	V	K	T	L	T	D	D	Q
A/gadwall duck/ALB/53/1977(H4N6)	-	-	-	-	M	L	S	I	T	I	L	F	L	L	I	A	E	G	S	S	Q	N	Y	T	G	N	P	V	I	C	L	G	H	H	A	V	S	N	G	T	M	V	K	T	L	T	D	D	Q
A/redhead duck/ALB/74/1977(H4N6)	-	-	-	-	M	L	S	I	T	I	L	F	L	L	I	A	E	G	S	S	Q	N	Y	T	G	N	P	V	I	C	L	G	H	H	A	V	S	N	G	T	M	V	K	T	L	T	D	D	Q
A/blue-winged teal/ALB/243/1977(H4N6)	-	-	-	-	M	L	S	I	T	I	L	F	L	L	I	A	E	G	S	S	Q	N	Y	T	G	N	P	V	I	C	L	G	H	H	A	V	S	N	G	T	M	V	K	T	L	T	D	D	Q
A/mallard duck/ALB/161/1977(H4N6)	-	-	-	-	M	L	S	I	T	I	L	F	L	L	I	A	E	G	S	S	Q	N	Y	T	G	N	P	V	I	C	L	G	H	H	A	V	S	N	G	T	M	V	K	T	L	T	D	D	Q
A/pintail duck/ALB/220/1977(H4N8)	-	-	-	-	M	L	S	I	T	I	L	F	L	L	I	A	E	G	S	S	Q	N	Y	T	G	N	P	V	I	C	L	G	H	H	A	V	S	N	G	T	M	V	K	T	L	T	D	D	Q
A/mallard duck/Alberta/354/1978(H4N2)	-	-	-	-	M	L	S	I	T	I	L	F	L	L	I	A	E	G	S	S	Q	N	Y	T	G	N	P	V	I	C	L	G	H	H	A	V	S	N	G	T	M	V	K	T	L	T	D	D	Q
A/mallard duck/Alberta/106/1979(H4N2)	-	-	-	-	M	L	S	I	T	I	L	F	L	L	I	A	E	G	S	S	Q	N	Y	T	G	N	P	V	I	C	L	G	H	H	A	V	S	N	G	T	M	V	K	T	L	T	D	D	Q
A/blue-winged teal/Alberta/580/1979(H4N2)	-	-	-	-	M	L	S	I	T	I	L	F	L	L	I	A	E	G	S	S	Q	N	Y	T	G	N	P	V	I	C	L	G	H	H	A	V	S	N	G	T	M	V	K	T	L	T	D	D	Q
H5
A/Viet Nam/1203/2004(H5N1)--568	-	-	-	-	-	-	-	-	-	-	M	E	K	I	V	L	L	F	A	I	V	S	L	V	K	S	D	Q	I	C	I	G	Y	H	A	N	N	S	T	E	Q	V	D	T	I	M	E	K	N
A/Egypt/N01310/2009(H5N1)	-	-	-	-	-	-	-	-	-	-	M	E	K	I	V	L	L	L	A	I	V	S	L	V	K	S	D	Q	I	C	I	G	Y	H	A	N	N	S	T	E	Q	V	D	T	I	M	E	K	N
A/chicken/Vietnam/NCVD-05/2008(H5N1)-571AA	-	-	-	-	-	-	-	-	-	-	M	E	K	I	V	L	L	L	A	I	I	S	L	V	K	S	D	Q	I	C	I	G	Y	H	A	N	N	S	T	E	Q	V	D	T	I	M	E	K	N
A/environment/Hunan/2-16/2007(H5N1)-568AA	-	-	-	-	-	-	-	-	-	-	M	E	K	I	V	L	L	L	A	I	I	G	L	V	K	S	D	Q	I	C	I	G	Y	H	A	N	N	S	T	E	Q	V	D	T	I	M	E	K	N
St Jude H5N1 seed 163222-564AA	-	-	-	-	-	-	-	-	-	-	M	E	K	I	V	L	L	L	A	I	V	S	L	V	K	S	D	Q	I	C	I	G	Y	H	A	N	N	S	T	E	Q	V	D	T	I	M	E	K	N
A/Indonesia/CDC594/2006(H5N1)	-	-	-	-	-	-	-	-	-	-	M	E	K	I	V	L	L	L	A	T	V	S	L	V	K	S	D	Q	I	C	I	G	Y	H	A	N	N	S	T	E	Q	V	D	T	I	M	E	K	N
A/duck/Minnesota/1525/1981(H5N1)	-	-	-	-	-	-	-	-	-	-	M	E	R	I	V	I	A	L	A	I	I	S	V	V	K	G	D	Q	I	C	I	G	Y	H	A	N	N	S	T	E	Q	V	D	T	I	M	E	K	N
A/chicken/Scotland/1959(H5N1)	-	-	-	-	-	-	-	-	-	-	M	E	R	I	V	L	L	L	A	I	V	S	L	V	K	S	D	Q	I	C	I	G	Y	H	A	N	K	S	T	K	Q	V	D	T	I	M	E	K	N
A/duck/Hubei/wg/2002(H5N1)	-	-	-	-	-	-	-	-	-	-	M	E	K	I	V	L	L	L	A	I	V	S	L	V	K	S	D	Q	I	C	I	G	Y	H	A	N	N	S	T	E	Q	V	D	T	I	M	E	K	N
A/chicken/Hubei/wh/1997(H5N1)	-	-	-	-	-	-	-	-	-	-	M	E	K	I	V	L	L	L	A	I	V	S	L	V	K	S	D	Q	I	C	I	G	Y	H	A	N	N	S	T	E	Q	V	D	T	I	M	E	K	N
H6
A/pigeon/Hong Kong/WF47/2003(H6N1)-567AA	-	-	-	-	-	-	-	-	-	-	M	I	A	I	I	V	I	A	I	L	A	A	A	G	K	S	D	K	I	C	I	G	Y	H	A	N	N	S	T	T	Q	V	D	T	I	L	E	K	N
A/guillemot/Sweden/3/00(H6N2)	-	-	-	-	-	-	-	-	-	-	M	I	A	I	L	V	I	V	I	L	V	T	A	G	K	S	D	K	I	C	I	G	Y	H	A	N	N	S	T	T	Q	V	D	T	I	L	E	K	N
A/turkey/Canada/63(H6N2)	-	-	-	-	-	-	-	-	-	-	M	I	A	I	I	I	L	A	I	V	A	S	T	S	K	S	D	K	I	C	I	G	Y	H	A	N	N	S	T	T	Q	V	D	T	I	L	E	K	N
A/mallard duck/ALB/250/1978(H6N2)	-	-	-	-	-	-	-	-	-	-	M	I	A	I	I	I	I	A	V	V	A	S	T	S	K	S	D	K	I	C	I	G	Y	H	A	N	N	S	T	T	Q	V	D	T	I	L	E	K	N
A/blue-winged teal/Alberta/368/1978(H6N8)	-	-	-	-	-	-	-	-	-	-	M	I	A	I	I	I	I	A	V	V	A	S	T	S	K	S	D	K	I	C	I	G	Y	H	A	N	N	S	T	T	Q	V	D	T	I	L	E	K	N
A/blue-winged teal/ALB/48/1978(H6N5)	-	-	-	-	-	-	-	-	-	-	M	I	A	I	I	I	L	A	V	V	A	S	T	S	K	S	D	K	I	C	I	G	Y	H	A	N	N	S	T	T	Q	V	D	T	I	L	E	K	N
A/pintail duck/ALB/1298/1979(H6N9)	-	-	-	-	-	-	-	-	-	-	M	I	A	I	I	I	L	A	I	V	V	S	T	S	K	S	D	R	I	C	I	G	Y	H	A	N	N	S	T	T	Q	V	D	T	I	L	E	K	N
A/mallard duck/ALB/730/1981(H6N1)	-	-	-	-	-	-	-	-	-	-	M	I	A	I	I	I	L	A	I	V	A	S	T	S	K	S	D	K	I	C	I	G	Y	H	A	N	N	S	T	T	Q	V	D	T	I	L	E	K	N
A/blue-winged teal/ALB/685/1982(H6N4)	-	-	-	-	-	-	-	-	-	-	M	I	A	I	I	I	L	A	I	V	V	S	T	S	K	S	D	R	I	C	I	G	Y	H	A	N	N	S	T	T	Q	V	D	T	I	L	E	K	N
A/shoveler/ALB/114/1985(H6N2)	-	-	-	-	-	-	-	-	-	-	M	I	A	I	I	I	L	A	I	V	V	S	T	S	K	S	D	R	I	C	I	G	Y	H	A	N	N	S	T	T	Q	V	D	T	I	L	E	K	N
H7
A/equine/Prague/1/1956(H7N7)--570AA	-	-	-	-	-	-	-	-	M	N	T	Q	I	L	I	L	A	T	S	A	F	F	Y	V	R	A	D	K	I	C	L	G	H	H	A	V	S	N	G	T	K	V	D	T	L	T	E	K	G
A/equine/Sao Paulo/4/1976(H7N7)	-	-	-	-	-	-	-	-	M	N	T	Q	I	L	I	L	A	I	S	A	F	L	C	V	R	A	D	K	I	C	L	G	H	H	A	V	S	N	G	T	K	V	D	T	L	T	E	K	G
A/duck/Victoria/1976(H7N7)	-	-	-	-	-	-	-	-	M	N	T	Q	I	L	I	L	T	L	V	A	V	I	H	T	N	A	D	K	I	C	L	G	H	H	A	V	S	N	G	T	K	V	N	T	L	T	E	R	G
A/wild bird feces/Korea/HDR22/2006(H7N7)	-	-	-	-	-	-	-	-	M	N	T	Q	I	L	V	F	A	L	V	A	I	I	P	T	N	A	D	K	I	C	L	G	H	H	A	V	S	N	G	T	K	V	N	T	L	T	E	R	G
A/northern pintail/Akita/1368/2008(H7N7)	-	-	-	-	-	-	-	-	M	N	T	Q	I	L	V	F	A	L	V	A	I	I	P	T	N	A	D	K	I	C	L	G	H	H	A	V	S	N	G	T	K	V	N	T	L	T	E	R	G
A/England/268/1996(H7N7)	-	-	-	-	-	-	-	-	M	N	T	Q	I	L	I	L	A	L	V	A	I	I	P	T	N	A	D	K	I	C	L	G	H	H	A	V	S	N	G	A	K	V	N	T	L	T	E	R	G
A/duck/Hokkaido/1/2010 (H7N7)	-	-	-	-	-	-	-	-	M	N	T	Q	I	L	V	F	A	L	V	A	I	I	P	T	N	A	D	K	I	C	L	G	H	H	A	V	S	N	G	T	K	V	N	T	L	T	E	R	G
A/ruddy turnstone/Delaware/892/2006(H7N7)	-	-	-	-	-	-	-	-	M	N	T	Q	I	L	A	F	I	A	C	M	L	I	G	A	K	G	D	K	I	C	L	G	H	H	A	V	A	N	G	T	K	V	N	T	L	T	E	K	G
A/mallard/Korea/GG2/2007(H7N7)	-	-	-	-	-	-	-	-	M	N	T	Q	I	L	V	F	A	L	V	A	I	I	P	T	N	A	D	K	I	C	L	G	H	H	A	V	S	N	G	T	K	V	N	T	L	T	E	R	G
A/wild bird feces/Korea/ESD07/2005(H7N7)	-	-	-	-	-	-	-	-	M	N	T	Q	I	L	V	F	A	L	V	A	I	I	P	T	S	A	D	K	I	C	L	G	H	H	A	V	S	N	G	T	K	V	N	T	L	T	E	R	G
H8
A/American black duck/Illinois/4119/2009(H8N4)-566AA	-	-	-	-	-	-	-	-	-	M	E	K	F	I	A	I	A	M	L	L	A	S	T	N	A	Y	D	R	I	C	I	G	Y	Q	S	N	N	S	T	D	T	V	N	T	L	I	E	Q	N
A/pintail/Barrow/38/2005(H8N4)	-	-	-	-	-	-	-	-	-	M	E	K	F	I	A	M	A	M	L	L	A	S	T	N	A	Y	D	R	I	C	I	G	Y	Q	S	N	N	S	T	D	T	V	N	T	L	I	E	Q	N
A/pintail/Barrow/140/2005(H8N4)	-	-	-	-	-	-	-	-	-	M	E	K	F	I	A	M	A	M	L	L	A	S	T	N	A	Y	D	R	I	C	I	G	Y	Q	S	N	N	S	T	D	T	V	N	T	L	I	E	Q	N
A/northern pintail/Alaska/44204-073/2006(H8N4)	-	-	-	-	-	-	-	-	-	M	E	K	F	I	A	M	A	M	L	L	A	S	T	N	A	Y	D	R	I	C	I	G	Y	Q	S	N	N	S	T	D	T	V	N	T	L	I	E	Q	N
A/northern shoveler/California/HKWF1203/2007(H8N4)	-	-	-	-	-	-	-	-	-	M	E	K	F	I	A	I	A	M	L	L	V	S	T	N	A	Y	D	R	I	C	I	G	Y	Q	S	N	N	S	T	D	T	V	N	T	L	I	E	Q	N
A/northern shoveler/California/HKWF1325/2007(H8N4)	-	-	-	-	-	-	-	-	-	M	E	K	F	I	A	I	A	M	L	L	A	S	T	N	A	Y	D	R	I	C	I	G	Y	Q	S	N	N	S	T	D	T	V	N	T	L	I	E	Q	N
A/duck/Alaska/702/1991(H8N7)	-	-	-	-	-	-	-	-	-	M	E	K	F	I	A	I	A	M	L	L	A	S	T	N	A	Y	D	R	I	C	I	G	Y	Q	S	N	N	S	T	D	T	V	D	T	L	I	E	Q	N
A/duck/Hokkaido/95/1981(H8N4)	-	-	-	-	-	-	-	-	-	M	E	K	F	I	I	I	T	M	L	L	V	S	T	N	A	Y	D	R	I	C	I	G	Y	Q	S	N	N	S	T	D	T	V	N	T	L	I	E	Q	N
A/duck/Thailand/SP-355/2007(H8N4)	-	-	-	-	-	-	-	-	-	M	E	K	F	I	I	M	T	M	L	L	V	S	T	N	A	Y	D	R	I	C	I	G	Y	Q	S	N	N	S	T	D	T	V	N	T	L	I	E	Q	N
A/common teal/Netherlands/1/2005(H8N4)	-	-	-	-	-	-	-	-	-	M	D	K	F	I	I	M	T	M	L	L	V	S	T	N	A	Y	D	R	I	C	I	G	Y	Q	S	N	N	S	T	D	T	V	N	T	L	I	E	Q	N
H9
A/chicken/Osaka/aq48/97(H9N2)--560AA	-	-	-	-	-	-	-	-	M	E	A	I	S	L	I	T	I	L	L	V	V	T	A	S	N	A	D	K	I	C	I	G	Y	Q	S	T	N	S	T	E	T	V	D	T	L	T	E	N	N
A/swine/Guangdong/wxl/2004(H9N2)	-	-	-	-	-	-	-	-	M	E	V	V	S	L	I	T	I	I	L	V	V	T	V	S	N	A	D	K	I	C	I	G	Y	Q	S	T	N	S	T	E	T	V	D	T	L	T	E	N	N
A/swine/Shandong/w4/2003(H9N2)	-	-	-	-	-	-	-	-	M	E	A	L	S	L	I	T	I	L	L	V	V	T	V	S	N	A	D	K	I	C	I	G	Y	Q	S	T	N	S	T	E	T	V	D	T	P	T	E	N	N
A/swine/Jiangxi/wx2/2004(H9N2)	-	-	-	-	-	-	-	-	M	E	V	V	S	L	I	T	I	I	L	V	V	T	V	S	N	A	D	K	I	C	I	G	Y	Q	S	T	N	S	T	E	T	V	D	T	L	T	E	N	N
A/bird/Guangxi/A1/2006(H9N2)	-	-	-	-	-	-	-	-	M	E	V	V	S	L	I	N	I	L	L	V	V	T	V	S	N	A	D	K	I	C	I	G	Y	Q	S	T	N	S	T	E	T	V	D	T	L	T	E	N	N
A/quail/Guangxi/B1/2006(H9N2)	-	-	-	-	-	-	-	-	M	K	A	L	S	L	I	T	I	L	L	V	V	T	V	S	N	A	D	K	I	C	I	G	Y	Q	S	T	N	S	T	E	T	V	D	T	L	T	E	N	N
A/chicken/HongKong/AP45/03(H9N2)	-	-	-	-	-	-	-	-	M	E	V	V	S	L	I	T	I	L	L	V	V	T	V	S	N	A	D	K	I	C	I	G	Y	Q	S	T	N	S	T	E	T	V	D	T	L	T	E	N	N
A/chicken/Zhejiang/HE1/2009(H9N2)	-	-	-	-	-	-	-	-	M	E	V	V	S	L	I	T	M	L	L	V	A	T	V	I	N	A	D	E	I	C	I	G	Y	Q	S	T	N	S	T	E	T	V	D	T	L	T	E	N	N
A/chicken/Shandong/WE1/2011(H9N2)	-	-	-	-	-	-	-	-	-	-	-	-	S	L	I	T	I	L	L	V	V	T	V	S	N	A	D	K	I	C	I	G	Y	Q	S	T	N	S	T	E	T	V	D	T	L	T	E	N	N
A/chicken/Fujian/FH7/2007(H9N2)	-	-	-	-	-	-	-	-	M	E	T	V	S	L	I	T	M	L	L	V	V	T	M	S	S	A	D	K	I	C	I	G	Y	Q	S	T	N	S	T	E	T	V	D	T	L	T	E	N	N
H10
A/mute swan/Netherlands/1/2006(H10N7)-561AA	-	-	-	-	-	-	-	-	-	M	Y	K	I	V	V	I	I	A	L	I	G	A	V	K	G	L	D	K	I	C	L	G	H	H	A	V	A	N	G	T	V	V	K	T	L	T	N	E	H
A/duck/Hong Kong/562/1979H(10N9)	-	-	-	-	-	-	-	-	-	M	Y	K	V	A	V	I	I	V	L	L	G	A	V	R	G	L	D	K	I	C	L	G	H	H	A	V	A	N	G	T	I	V	K	T	L	T	N	E	Q
A/duck/Shimane/45/1997	-	-	-	-	-	-	-	-	-	M	Y	K	V	V	V	I	I	A	L	L	G	A	V	K	G	L	D	K	I	C	L	G	H	H	A	V	A	N	G	T	I	V	K	T	L	T	N	E	Q
A/longtail duck/Maryland/295/2005	-	-	-	-	-	-	-	-	-	M	Y	K	I	V	L	V	L	A	L	L	G	A	V	H	G	L	D	K	I	C	L	G	H	H	A	V	P	N	G	T	I	V	K	T	L	T	N	E	K
A/common scoter/Maryland/297/2005	-	-	-	-	-	-	-	-	-	M	Y	K	I	V	L	V	L	A	L	L	G	A	V	H	G	L	D	K	I	C	L	G	H	H	A	V	P	N	G	T	I	V	K	T	L	T	N	E	K
A/mallard/Ohio/122/1989	-	-	-	-	-	-	-	-	-	M	Y	K	I	V	L	I	L	A	L	L	G	A	V	H	G	L	D	K	I	C	L	G	H	H	A	V	P	N	G	T	I	V	K	T	L	T	N	E	K
A/Duck/Indonesia/Jakarta Utara1631-29/2006	-	-	-	-	-	-	-	-	-	M	Y	K	I	I	V	I	I	A	L	L	G	A	V	R	C	L	D	K	I	C	L	G	H	H	A	V	A	N	G	T	F	V	K	T	L	T	S	E	Q
A/northern shoveler/California/HKWF1005/2007	-	-	-	-	-	-	-	-	-	M	Y	K	I	V	L	V	L	A	L	L	G	A	V	H	G	L	D	K	I	C	L	G	H	H	A	V	S	N	G	T	I	V	K	T	L	T	N	E	K
A/northern shoveler/California/HKWF1370/2007	-	-	-	-	-	-	-	-	-	M	Y	K	V	V	L	V	L	A	L	L	G	A	V	H	G	L	D	K	I	C	L	G	H	H	A	V	S	N	G	T	I	V	K	T	L	T	N	E	K
A/chicken/California/755/1999	-	-	-	-	-	-	-	-	-	M	Y	K	T	A	L	V	L	A	L	L	G	A	V	H	G	L	D	K	I	C	L	G	H	H	A	V	P	N	G	T	I	V	K	T	L	T	N	E	K
H11
A/duck/England/1/1956(H11N6)--565AA	-	-	-	-	-	-	-	-	-	-	M	E	K	T	L	L	F	A	A	I	F	L	C	V	K	A	D	E	I	C	I	G	Y	L	S	N	N	S	T	D	K	V	D	T	I	I	E	N	N
A/mallard/Netherlands/7/99(H11N2)	-	-	-	-	-	-	-	-	-	-	M	K	K	A	L	L	F	A	A	I	F	L	Y	A	K	A	D	E	I	C	I	G	Y	L	S	N	N	S	T	D	K	V	D	T	I	I	E	N	N
A/duck/Yangzhou/906/2002(H11N2)	-	-	-	-	-	-	-	-	-	-	M	E	K	T	L	L	F	A	T	I	F	L	C	V	K	A	D	E	I	C	I	G	Y	L	S	N	N	S	T	D	K	V	D	T	I	I	E	N	N
A/mallard/Alberta/294/1977(H11N9)	-	-	-	-	-	-	-	-	-	-	M	K	K	A	L	L	F	A	A	I	I	I	C	I	Q	A	D	E	I	C	I	G	Y	L	S	N	N	S	T	E	K	V	D	T	I	I	E	S	N
A/mallard/Alberta/245/2003(H11N9)	-	-	-	-	-	-	-	-	-	-	M	K	K	V	L	L	F	A	A	I	I	I	C	I	K	A	D	E	I	C	I	G	Y	L	S	N	N	S	T	E	K	V	D	T	I	I	E	S	N
A/mallard duck/ALB/797/1983(H11N3)	-	-	-	-	-	-	-	-	-	-	M	K	K	V	L	L	F	A	A	I	I	I	C	I	Q	A	D	E	I	C	I	G	Y	L	S	N	N	S	T	E	K	V	D	T	I	I	E	S	N
A/mallard/ALB/124/1991(H11N2)	-	-	-	-	-	-	-	-	-	-	M	K	K	V	L	L	F	A	A	I	I	I	C	I	Q	A	D	E	I	C	I	G	Y	L	S	N	N	S	T	E	K	V	D	T	I	I	E	S	N
A/pintail/Alberta/84/2000(H11N9)	-	-	-	-	-	-	-	-	-	-	M	K	K	L	L	L	F	A	A	I	I	I	C	I	Q	A	D	E	I	C	I	G	Y	L	S	N	N	S	T	E	K	V	D	T	I	I	E	S	N
A/shorebird/DE/236/2003(H11N9)	-	-	-	-	-	-	-	-	-	-	M	K	K	A	I	L	L	A	A	I	I	I	C	I	Q	A	D	E	I	C	I	G	Y	L	S	N	N	S	T	E	K	V	D	T	I	I	E	S	N
A/sharp-tailed sandpiper/Australia/6/2004(H11N9)	-	-	-	-	-	-	-	-	-	-	M	K	K	A	L	L	F	A	A	I	F	L	Y	V	K	A	D	E	I	C	I	G	Y	L	S	N	N	S	T	D	K	V	D	T	I	I	E	N	N
H12
A/mallard/California/6490/2008(H12N5))--564AA	-	-	-	-	-	-	-	-	-	M	E	K	F	I	I	L	S	T	V	L	A	V	S	F	A	Y	D	K	I	C	I	G	Y	Q	T	N	N	S	T	E	T	V	N	T	L	I	E	Q	N
A/pintail/Alaska/314/2005(mixed))	-	-	-	-	-	-	-	-	-	M	E	K	F	I	I	L	S	T	V	L	A	M	S	F	A	Y	D	K	I	C	I	G	Y	Q	T	N	N	S	T	E	T	V	N	T	L	I	E	Q	N
A/laughing gull/Delaware/94/2000(H12N4)	-	-	-	-	-	-	-	-	-	M	E	K	F	I	I	L	S	T	V	L	A	V	S	F	A	Y	D	K	I	C	I	G	Y	Q	T	N	N	S	T	E	T	V	N	T	L	I	E	Q	N
A/ruddy turnstone/Delaware/Sg-00540/2008(H12N4)	-	-	-	-	-	-	-	-	-	-	-	-	-	-	F	L	S	T	V	L	A	V	S	L	A	Y	D	K	I	C	I	G	Y	Q	T	N	N	S	T	E	T	V	N	T	L	I	E	Q	N
A/mallard/California/6524/2008(H12N5)	-	-	-	-	-	-	-	-	-	M	E	K	F	I	I	L	S	T	V	L	T	V	S	V	A	Y	D	K	I	C	I	G	Y	Q	T	N	N	S	T	E	T	V	N	T	L	I	E	Q	N
A/mallard/Wisconsin/4218/2009(H12N5)	-	-	-	-	-	-	-	-	-	M	E	K	F	I	I	L	S	T	V	L	A	V	S	F	A	Y	D	K	I	C	I	G	Y	Q	T	N	N	S	T	E	T	V	N	T	L	I	E	Q	N
A/northern pintail/Missouri/319/2009(H12N5)	-	-	-	-	-	-	-	-	-	M	E	K	F	I	I	L	S	T	V	L	T	V	S	V	A	Y	D	K	I	C	I	G	Y	Q	T	N	N	S	T	E	T	V	N	T	L	I	E	Q	N
A/mallard/Ohio/1688/2009(H12N5)	-	-	-	-	-	-	-	-	-	M	E	K	F	I	I	L	S	T	V	L	A	V	S	F	A	Y	D	K	I	C	I	G	Y	Q	T	N	N	S	T	E	T	V	N	T	L	I	E	Q	N
A/mallard/Alberta/221/2006(H12N6)	-	-	-	-	-	-	-	-	-	M	E	K	F	I	I	L	S	T	V	L	A	V	S	F	A	Y	D	K	I	C	I	G	Y	Q	T	N	N	S	T	E	T	V	N	T	L	I	E	Q	N
A/duck/Alberta/60/1976(H12N5)	-	-	-	-	-	-	-	-	-	M	E	K	F	I	I	L	S	T	V	L	A	A	S	F	A	Y	D	K	I	C	I	G	Y	Q	T	N	N	S	T	E	T	V	N	T	L	S	E	Q	N
H13
A/gull/Maryland/704/1977(H13N6)-567AA	-	-	-	-	-	-	-	-	M	A	L	N	V	I	A	T	L	T	L	I	S	V	C	V	H	A	D	R	I	C	V	G	Y	L	S	T	N	S	S	E	R	V	D	T	L	L	E	N	G
A/black-headed gull/Astrakhan/227/84(H13N6)	-	-	-	-	-	-	-	-	M	D	I	Q	A	V	A	L	L	I	L	T	S	T	C	V	Q	A	D	R	I	C	V	G	Y	L	S	T	N	S	S	E	K	V	N	T	L	L	E	N	D
A/ring-billed gull/Maryland/704/1977(H13N6)	-	-	-	-	-	-	-	-	M	A	L	N	V	I	A	T	L	T	L	I	S	V	C	V	H	A	D	R	I	C	V	G	Y	L	S	T	N	S	S	E	R	V	D	T	L	L	E	N	G
A/pilot whale/Maine/328 HN/1984(H13N2)	-	-	-	-	-	-	-	-	M	D	I	R	P	I	I	I	S	L	L	I	S	T	C	V	Q	A	D	R	I	C	V	G	Y	L	S	T	N	S	T	E	K	V	D	T	L	L	E	N	D
A/black-headed gull/Netherlands/1/00(H13N8)	-	-	-	-	-	-	-	-	M	D	I	P	V	I	A	F	L	I	L	T	S	T	C	V	Q	A	D	R	I	C	V	G	Y	L	S	T	N	S	S	E	R	V	D	T	L	L	E	N	N
A/black-headed gull/Sweden/1/1999(H13N6)	-	-	-	-	-	-	-	-	M	D	I	P	V	V	A	F	L	I	L	T	S	T	C	V	Q	A	D	R	I	C	V	G	Y	L	S	T	N	S	S	E	K	V	D	T	L	L	E	N	D
A/herring gull/DE/475/1986(H13N2)	-	-	-	-	-	-	-	-	M	D	I	R	S	I	V	I	S	L	L	I	S	T	C	V	Q	A	D	R	I	C	V	G	Y	L	S	T	N	S	T	E	K	V	D	T	L	L	E	N	D
A/shorebird/DE/68/2004(H13N9)	-	-	-	-	-	-	-	-	M	D	I	K	A	V	A	L	L	I	L	T	S	T	C	I	Q	A	D	R	I	C	V	G	Y	L	S	T	N	S	S	E	K	V	D	T	L	L	E	N	G
A/herring gull/NJ/782/1986(H13N2)	-	-	-	-	-	-	-	-	M	D	I	R	S	I	V	I	S	L	L	I	S	T	C	V	Q	A	D	R	I	C	V	G	Y	L	S	T	N	S	T	E	K	V	D	T	L	L	E	N	D
A/laughing gull/Delaware Bay/2838/1987(H13N2)	-	-	-	-	-	-	-	-	M	D	I	R	S	I	V	I	S	L	L	I	S	T	C	V	Q	A	D	R	I	C	V	G	Y	L	S	T	N	S	T	E	K	V	D	T	L	L	E	N	D
H14
A/mallard/Astrakhan/263/1982(H14N5)--568AA	M	I	A	L	I	L	V	A	L	A	L	S	H	T	A	Y	S	Q	I	T	N	G	T	T	G	N	P	I	I	C	L	G	H	H	A	V	E	N	G	T	S	V	K	T	L	T	D	N	H
A/herring gull/Astrakhan/267/1982(H14N5)	M	I	A	L	I	L	V	A	L	A	L	S	H	T	A	Y	S	Q	I	T	N	G	T	T	G	N	P	I	I	C	L	G	H	H	A	V	E	N	G	T	S	V	K	T	L	T	D	N	H
A/mallard/Gurjev/263/1982(H14N5)	-	-	-	-	-	-	-	-	-	G	S	E	H	T	A	Y	S	Q	I	T	N	G	T	T	G	N	P	I	I	C	L	G	H	H	A	V	E	N	G	T	S	V	K	T	L	T	D	N	H
H15
A/teal/Chany/7119/2008(H15N4)-570AA	-	-	-	-	-	-	-	-	M	N	T	Q	I	I	A	I	L	V	L	G	L	S	V	A	K	S	D	K	I	C	L	G	H	H	A	V	A	N	G	T	K	V	N	T	L	T	E	K	G
A/duck/Australia/341/1983(H15N8)	-	-	-	-	-	-	-	-	M	N	T	Q	I	I	V	I	L	V	L	G	L	S	M	V	R	S	D	K	I	C	L	G	H	H	A	V	A	N	G	T	K	V	N	T	L	T	E	K	G
A/shearwater/West Australia/2576/79(H15N9)	-	-	-	-	-	-	-	-	M	N	T	Q	I	I	V	I	L	V	L	G	L	S	M	V	K	S	D	K	I	C	L	G	H	H	A	V	A	N	G	T	K	V	N	T	L	T	E	R	G
A/duck/Australia/341/1983(H15N8)(2)	-	-	-	-	-	-	-	-	M	N	T	Q	I	I	V	I	L	V	L	G	L	S	M	V	R	S	D	K	I	C	L	G	H	H	A	V	A	N	G	T	K	V	N	T	L	T	E	K	G
A/wedge-tailed shearwater/Western Australia/2576/1979(H15N9)	-	-	-	-	-	-	-	-	M	N	T	Q	I	I	V	I	L	V	L	G	L	S	M	V	K	S	D	K	I	C	L	G	H	H	A	V	A	N	G	T	K	V	N	T	L	T	E	R	G
A/sooty tern/Western Australia/2190/1983(H15N9)	-	-	-	-	-	-	-	-	M	N	T	Q	I	I	V	I	L	V	L	G	L	S	M	V	K	S	D	K	I	C	L	G	H	H	A	V	A	N	G	T	K	V	N	T	L	T	E	R	G
A/wedge-tailed shearwater/Western Australia/2327/1983(H15N9)	-	-	-	-	-	-	-	-	M	N	T	Q	I	I	V	I	L	V	L	G	L	S	M	V	K	S	D	K	I	C	L	G	H	H	A	V	A	N	G	T	K	V	N	T	L	T	E	R	G
A/Australian shelduck/Western Australia/1756/1983 1983(H15N2)	-	-	-	-	-	-	-	-	M	N	T	Q	I	I	V	I	L	V	L	G	L	S	M	V	K	S	D	K	I	C	L	G	H	H	A	V	A	N	G	T	K	V	N	T	L	T	E	R	G
A/duck/Australia/341/1983(H15N8)(3)	-	-	-	-	-	-	-	-	M	N	T	Q	I	I	V	I	L	V	L	G	L	S	M	V	R	S	D	K	I	C	L	G	H	H	A	V	A	N	G	T	K	V	N	T	L	T	E	K	G
A/Australian shelduck/Western Australia/1762/1979(H15N9)	-	-	-	-	-	-	-	-	M	N	T	Q	I	I	V	I	L	V	L	G	L	S	M	V	K	S	D	K	I	C	L	G	H	H	A	V	A	N	G	T	K	V	N	T	L	T	E	R	G
H16
A/black-headed gull/Sweden/2/99(H16N3)--565AA	-	-	-	-	-	-	-	-	M	A	K	T	L	Y	L	L	V	L	I	F	V	K	Y	S	R	A	D	K	I	C	I	G	Y	L	S	N	N	S	T	D	T	V	D	T	L	T	E	N	G
A/black-headed gull/Sweden/3/99(H16N3)	-	-	-	-	-	-	-	-	M	A	K	T	L	Y	L	L	V	L	I	F	V	K	Y	S	R	A	D	K	I	C	I	G	Y	L	S	N	N	S	T	D	T	V	D	T	L	T	E	N	G
A/herring gull/Delaware/712/1988(H16N3)	-	-	-	-	-	-	-	M	A	V	K	V	L	H	L	L	I	I	V	L	G	R	Y	S	I	A	D	K	I	C	I	G	Y	L	S	N	N	S	S	D	T	V	D	T	L	T	E	N	G
A/shorebird/New Jersey/840/1986(H16N3)	-	-	-	-	-	-	-	M	A	I	K	V	L	H	L	L	I	I	V	L	G	R	Y	S	I	A	D	K	I	C	I	G	Y	L	S	N	N	S	S	D	T	V	D	T	L	T	E	N	G
A/black-legged kittywake/Alaska/295/1975(H16N3)	-	-	-	-	-	-	-	M	M	I	K	V	L	H	L	L	I	I	V	L	G	R	Y	S	R	A	D	K	I	C	I	G	Y	L	S	N	N	S	S	D	T	V	D	T	L	T	E	N	G
A/shorebird/Delaware/168/06(H16N3)	-	-	-	-	-	-	-	M	M	V	K	V	L	Y	F	L	I	I	V	F	G	R	Y	S	K	A	D	K	I	C	I	G	Y	L	S	N	N	S	T	D	K	I	D	T	L	T	E	T	G
A/mallard/Gurjev/785/83(H16N3)	-	-	-	-	-	-	-	-	M	V	K	A	L	Y	L	L	V	L	I	L	V	K	Y	S	R	A	D	K	I	C	I	G	Y	L	S	N	N	S	S	D	T	V	D	T	L	T	E	N	G
A/little tern/Gurjev/779/83(H16N3)	-	-	-	-	-	-	-	-	M	V	K	A	L	Y	L	L	V	L	I	L	V	K	Y	S	R	A	D	K	I	C	I	G	Y	L	S	N	N	S	S	D	T	V	D	T	L	T	E	N	G
A/teal/Volga/671/86(H16N3)	-	-	-	-	-	-	-	M	M	I	K	V	L	Y	F	L	I	I	V	L	G	R	Y	S	K	A	D	K	I	C	I	G	Y	L	S	N	N	S	S	D	T	V	D	T	L	T	E	N	G
A/slender-billed gull/Astrakhan/28/76(H16N3)	-	-	-	-	-	-	-	M	M	I	K	V	L	Y	F	L	I	I	V	L	G	R	Y	S	K	A	D	K	I	C	I	G	Y	L	S	N	N	S	S	D	T	V	D	T	L	T	E	N	G
H17
A/little yellow-shouldered bat/Guatemala/153/2009 (H17N10) -564AA	-	-	-	-	-	-	-	-	M	E	L	I	V	L	L	I	L	L	N	P	Y	T	F	V	L	G	D	R	I	C	I	G	Y	Q	A	N	Q	N	N	Q	T	V	N	T	L	L	E	Q	N
A/little yellow-shouldered bat/Guatemala/164/2009 (H17N10)	-	-	-	-	-	-	-	-	M	E	L	I	V	L	L	I	L	L	N	P	Y	T	F	V	L	G	D	R	I	C	I	G	Y	Q	A	N	Q	N	N	Q	T	V	N	T	L	L	E	Q	N
A/little yellow-shouldered bat/Guatemala/060/2010 (H17N10)	-	-	-	-	-	-	-	-	M	E	L	I	I	L	L	I	L	L	N	P	Y	T	F	V	L	G	D	R	I	C	I	G	Y	Q	A	N	Q	N	N	Q	T	V	N	T	L	L	E	Q	N
N1
A/swine/Fujian/1/2003(H5N1)-469AA	M	N	P	N	Q	K	I	T	T	I	G	S	I	C	M	V	I	G	I	I	S	L	M	L	Q	I	G	N	I	I	S	I	W	I	S	H	S	I	Q	T	G	N	Q	H	Q	A	E	P	C
A/Indonesia/CDC595/2006(H5N1)	M	N	P	N	Q	K	I	I	T	I	G	S	I	C	M	A	I	G	T	V	S	L	M	L	Q	I	G	N	M	I	S	I	W	V	S	H	S	I	Q	T	G	N	Q	H	Q	A	E	S	I
A/chicken/Jilin/ha/2003(H5N1)	M	N	P	N	Q	K	I	I	T	I	G	S	I	C	M	V	I	G	I	V	S	L	M	L	Q	I	G	N	M	I	S	I	W	V	S	H	S	I	Q	T	G	N	Q	H	Q	A	E	P	I
A/duck/Thailand/ICRC-V629/2008(H5N1)	M	N	P	N	K	K	I	I	T	I	G	S	I	C	M	V	T	G	M	V	S	L	M	L	Q	I	G	N	L	I	S	I	W	V	S	H	S	I	H	T	G	N	Q	Q	K	A	E	P	I
A/chicken/Vietnam/212/2005(H5N1)	M	N	P	N	Q	K	I	I	T	I	G	S	I	C	M	V	I	G	I	V	S	L	M	L	Q	I	G	N	M	I	S	I	W	V	S	H	S	I	Q	T	G	N	Q	H	Q	A	E	P	I
A/Bar-headed Goose/Qinghai/62/05(H5N1)	M	N	P	N	Q	K	I	I	T	I	G	S	I	C	M	V	I	G	I	V	S	L	M	L	Q	I	G	N	M	I	S	I	W	V	S	H	S	I	Q	T	G	N	Q	R	Q	A	E	P	I
A/Chile/1/1983(H1N1)	M	N	P	N	Q	K	I	I	T	I	G	S	I	C	M	T	I	G	I	I	S	L	I	L	Q	I	G	N	I	I	S	I	W	V	S	H	S	I	Q	T	G	S	Q	N	H	T	G	I	C
A/New Jersey/8/1976(H1N1)	M	N	T	N	Q	R	I	I	T	I	G	T	I	C	L	I	V	G	I	I	S	L	L	L	Q	I	G	N	I	I	L	L	W	M	S	H	S	I	Q	T	G	E	K	S	H	P	K	V	C
A/parrot/Ulster/73(H7N1)	M	N	P	N	Q	K	I	I	T	I	G	S	I	C	M	V	V	G	I	I	S	L	I	L	Q	I	G	N	I	I	S	I	W	V	S	H	S	I	Q	T	G	N	Q	N	Q	P	E	T	C
A/turkey/Chile/28317-6504-3/2009(H1N1)	M	N	P	N	Q	K	I	I	A	I	G	S	V	C	M	T	I	G	M	A	N	L	I	L	Q	I	G	N	I	I	S	I	W	I	S	H	S	I	Q	L	G	N	R	N	Q	I	E	T	C
A/Netherlands/2631c/2010(H1N1)	M	N	P	N	Q	K	I	I	T	I	G	S	V	C	M	T	I	G	M	A	N	L	I	L	Q	I	G	N	I	I	S	I	W	I	S	H	S	I	Q	L	G	N	Q	N	Q	I	E	T	C
N2
A/Memphis/8/1988(H3N2)-469AA	M	N	P	N	Q	K	I	I	T	I	G	S	V	S	L	T	I	A	T	I	C	F	L	M	Q	I	A	I	L	V	T	T	V	T	L	H	F	K	Q	Y	E	C	S	S	P	P	N	N	Q
A/Swine/Minnesota/593/99(H3N2)	M	N	P	N	Q	K	I	I	T	I	G	S	V	S	L	T	I	A	T	M	C	F	L	M	Q	I	A	I	L	V	T	T	V	T	L	H	F	K	Q	Y	E	C	N	S	P	P	N	N	Q
A/Waikato/22/2004(H3N2)	M	N	P	N	Q	K	I	I	T	I	G	S	V	S	L	T	I	S	T	I	C	F	F	M	Q	I	A	I	L	I	T	T	V	T	L	H	F	K	Q	Y	E	F	N	S	P	P	N	N	Q
A/Hong Kong/1-1-MA-20/1968	M	N	P	N	Q	K	I	I	T	I	G	S	V	S	L	T	I	A	T	V	C	F	L	M	Q	I	A	I	L	V	T	T	V	T	L	H	F	K	Q	Y	E	C	D	S	P	A	S	N	Q
A/Texas/40/2009(H3N2)	M	N	P	N	Q	K	I	I	T	I	G	S	V	S	L	T	I	S	T	I	C	F	F	M	Q	I	A	I	L	I	T	T	V	T	L	H	F	K	Q	Y	E	F	N	S	P	P	N	N	Q
A/swine/Guangdong/7/2006(H3N2)	M	N	P	N	Q	K	I	I	T	I	G	S	V	S	L	T	I	A	T	I	C	F	L	M	Q	I	A	I	L	V	T	T	V	T	L	H	F	K	Q	Y	E	C	N	S	P	P	N	N	Q
A/Japan/305/1957(H2N2)	M	N	P	N	Q	K	I	I	T	I	G	S	V	S	L	T	I	E	T	V	C	F	L	M	Q	I	A	I	L	A	T	T	V	T	L	H	F	K	Q	H	E	C	D	S	P	A	S	N	Q
A/Taiwan/1/64(H2N2)	M	N	P	N	Q	K	I	I	T	I	G	S	V	S	L	T	I	A	T	V	C	F	L	M	Q	I	A	I	L	V	T	T	V	T	L	H	F	K	Q	H	E	C	D	S	P	A	S	N	Q
A/Panama/1/67(H2N2)	M	N	P	N	Q	K	I	I	T	I	G	S	A	S	L	T	I	A	T	V	C	F	L	M	Q	I	A	I	L	V	T	T	V	T	L	H	F	K	Q	H	E	C	D	S	P	A	S	N	Q
A/Albany/1/65(H2N2)	M	N	P	N	Q	K	I	I	T	I	G	S	V	S	L	T	I	A	T	V	C	F	L	M	Q	I	A	I	L	V	T	T	V	T	L	H	F	K	Q	H	D	C	D	S	P	A	S	N	Q
N3
A/goose/Hong Kong/23/1978(H5N3)-469AA	M	N	P	N	Q	K	I	I	T	I	G	V	V	N	T	T	L	S	T	I	A	L	L	I	G	V	G	N	L	I	F	N	T	V	I	H	E	K	I	G	D	H	Q	T	V	V	Y	P	T
A/chicken/New Jersey/15086-3/1994(H7N3)	M	N	P	N	Q	K	I	I	A	I	G	V	V	N	T	T	L	S	T	I	A	L	L	I	G	V	G	N	L	V	F	N	T	V	I	H	E	K	I	G	D	-	-	-	-	-	-	-	-
A/turkey/England/1963(H7N3)	M	N	P	N	Q	K	I	I	T	I	G	V	V	N	T	T	L	S	T	I	A	L	L	I	G	V	G	N	L	I	S	N	T	V	I	H	E	K	I	G	D	H	Q	T	V	V	Y	P	-
A/duck/Postdam/1689/85(H2N3)	M	N	P	N	Q	K	I	I	T	I	G	V	V	N	T	T	L	S	T	I	A	L	L	I	G	V	G	N	L	V	F	N	T	V	I	H	E	K	I	G	D	H	Q	T	V	I	Y	P	T
A/duck/HongKong/27408/79(H5N3)	M	N	P	N	Q	K	I	I	T	I	G	V	V	N	T	T	L	S	T	I	A	L	L	I	G	V	G	N	L	V	F	N	T	V	I	H	E	K	I	G	D	H	Q	T	V	V	Y	P	T
A/turkey/Italy/214845/2002(H7N3)	M	N	P	N	Q	K	I	I	T	I	G	V	V	N	T	T	L	S	T	I	A	L	L	I	G	V	G	N	L	I	F	N	T	V	I	H	G	K	I	G	D	H	Q	T	V	V	Y	P	T
A/tern/South Africa/1961(H5N3)	M	N	P	N	Q	K	I	I	T	I	G	V	V	N	T	T	L	S	T	I	A	L	L	I	G	V	G	N	L	I	F	N	T	V	I	H	E	K	I	G	D	H	Q	T	V	V	Y	P	T
A/environment/Canada/av41/2004(H7N3)	M	N	P	N	Q	K	I	I	T	I	G	V	V	N	T	T	L	S	T	I	A	L	L	I	G	V	G	N	L	V	F	N	T	V	I	H	E	K	I	G	D	H	Q	I	V	T	H	P	T
A/Canada/rv504/2004(H7N3)	M	N	P	N	Q	K	I	I	T	I	G	V	V	N	T	T	L	S	T	I	A	L	L	I	G	V	G	N	L	V	F	N	T	V	I	H	E	K	I	G	D	H	Q	I	V	T	H	P	T
A/mallard/Alberta/205/1998(H2N3)	M	N	P	N	Q	K	I	I	T	I	G	V	V	N	T	T	L	S	T	I	A	L	L	I	G	V	G	N	L	V	F	N	T	V	I	H	E	K	I	G	D	H	Q	T	V	T	H	P	T
N4
A/American black duck/Illinois/4119/2009(H8N4)-469AA	M	N	P	N	Q	K	I	I	T	I	G	S	V	S	I	I	L	T	T	I	G	L	L	L	Q	I	T	S	L	C	S	I	W	F	S	H	Y	N	Q	V	T	Q	T	H	E	-	Q	P	C
A/gray teal/Australia/2/1979(H4N4)	M	N	P	N	Q	K	I	I	T	I	G	S	V	S	I	V	L	T	T	V	G	L	L	L	Q	I	T	S	L	C	S	I	W	F	S	H	Y	N	Q	V	T	Q	T	N	G	-	Q	P	C
A/mallard/Alberta/149/2002(H2N4)	M	N	P	N	Q	K	I	I	T	I	G	S	V	S	I	I	L	T	T	I	G	L	L	L	Q	I	T	S	L	C	S	I	W	F	S	H	Y	N	Q	V	T	Q	T	H	E	-	Q	P	C
A/blue-winged teal/ALB/685/1982(H6N4)	M	N	P	N	Q	K	I	I	T	I	G	S	A	S	I	I	L	T	T	I	G	L	L	L	Q	I	T	S	L	C	S	I	W	F	S	H	Y	N	Q	V	T	Q	T	H	E	-	Q	P	C
A/mallard duck/Alberta/299/1977(H4N4)	M	N	P	N	Q	K	I	I	T	I	G	S	A	S	I	V	L	T	T	I	G	L	L	L	Q	I	T	S	L	C	S	I	W	F	S	H	Y	N	Q	V	T	Q	T	H	E	-	Q	P	C
A/pintail/Barrow/38/2005(H8N4)	M	N	P	N	Q	K	I	I	T	I	G	S	V	S	I	I	L	T	T	V	G	L	L	L	Q	I	T	S	L	C	S	I	W	F	S	H	Y	N	Q	V	T	Q	T	H	E	-	Q	P	C
A/duck/Hokkaido/HY57/2005(H9N4)	M	N	P	N	Q	K	I	I	T	I	G	S	V	S	I	V	L	T	T	I	G	L	L	L	Q	I	T	S	L	C	S	I	W	F	S	H	Y	N	Q	V	T	Q	T	S	E	-	Q	P	C
A/duck/Thailand/SP-355/2007(H8N4)	M	N	P	N	Q	K	I	I	T	I	G	S	V	S	I	A	L	T	T	I	G	L	L	L	Q	I	T	S	L	C	S	I	W	F	S	H	Y	N	Q	V	T	Q	T	S	E	-	Q	P	C
A/Anas plathyrhynchos/Spain/1495/2008(H10N4)	M	N	P	N	Q	K	I	I	T	I	G	S	V	S	I	V	L	T	T	V	G	L	L	L	Q	I	T	S	L	C	S	I	W	F	S	H	Y	N	Q	V	T	Q	T	S	E	-	Q	P	C
A/chicken/NSW/1688/1997(H7N4)	M	N	P	N	Q	K	I	I	T	I	G	S	V	S	I	L	L	T	T	I	G	L	L	L	Q	I	T	S	L	C	S	I	W	F	S	H	Y	N	Q	V	T	Q	T	T	G	-	K	P	C
N5
A/mallard/California/6490/2008(H12N5)-473AA	M	N	P	N	Q	K	I	I	T	I	G	S	V	S	L	A	L	V	V	L	N	I	L	L	H	I	A	S	I	V	I	G	I	I	S	V	T	K	E	S	S	I	S	S	P	C	N	-	T
A/blue-winged teal/ALB/48/1978(H6N5)	M	N	P	N	Q	K	I	I	T	I	G	S	V	S	L	A	L	V	I	F	N	I	L	L	H	I	A	S	I	V	I	G	V	I	S	V	T	K	E	S	G	V	S	S	S	C	N	-	T
A/mallard/ALB/199/1992(H6N5)	M	N	P	N	Q	K	I	I	T	I	G	S	V	S	L	A	L	V	V	F	N	I	L	L	H	I	A	S	I	V	I	G	I	I	S	V	T	K	E	S	S	V	P	S	P	C	N	-	T
A/mallard/Alberta/154/2003(H6N5)	M	N	P	N	Q	K	I	I	T	I	G	S	V	S	L	A	L	V	V	F	N	I	L	L	H	I	A	S	I	A	I	G	I	I	S	V	T	K	E	S	S	I	S	S	P	C	N	-	T
A/mallard duck/ALB/60/1976(H12N5)	M	N	P	N	Q	K	I	I	T	I	G	S	V	S	L	A	L	V	I	F	N	I	L	L	H	I	A	S	I	A	I	G	I	I	S	V	T	K	E	S	S	V	S	S	S	C	N	-	T
A/red knot/Delaware/2561/87(H10N5)	M	N	P	N	Q	K	I	I	T	I	G	S	V	S	L	A	L	V	I	F	N	I	L	L	H	I	A	S	I	V	I	G	I	I	S	V	T	K	E	S	S	V	S	S	S	C	N	-	T
A/pintail duck/ALB/631/1981(H1N5)	M	N	P	N	Q	K	I	I	T	I	G	S	V	S	L	A	L	V	I	F	N	I	L	L	H	I	A	S	I	V	I	G	I	I	S	V	T	K	E	N	S	V	S	S	S	C	N	-	T
A/mallard/Alberta/663/1979(H3N5)	M	N	P	N	Q	K	I	I	T	I	G	S	V	S	L	A	L	V	I	F	N	I	L	L	H	I	A	S	I	V	I	G	I	I	S	V	T	R	E	S	S	V	S	S	S	C	N	-	T
A/pintail duck/Alberta/306/1983(H12N5)	M	N	P	N	Q	K	I	I	T	I	G	S	V	S	L	A	L	V	I	F	N	I	L	L	H	I	A	S	I	V	I	G	I	I	S	V	T	K	E	N	S	V	S	P	S	C	N	-	T
A/black duck/AUS/4045/1980(H6N5)	M	N	P	N	Q	K	I	I	T	I	G	S	A	S	L	G	L	V	I	F	N	I	L	L	H	V	A	S	I	A	L	G	V	I	S	A	T	K	D	N	-	K	V	H	A	C	N	-	V
N6
A/blue-winged teal/Minnesota/Sg-00040/2007(H4N6)-470AA	M	N	P	N	Q	K	I	I	C	I	S	A	T	G	M	T	L	S	V	V	S	L	L	I	G	L	A	N	L	G	L	N	I	G	L	H	F	K	V	G	D	T	P	E	T	V	T	P	S
A/gull/Maryland/704/1977(N13N6)	M	N	P	N	Q	K	I	I	C	I	S	A	T	G	M	T	L	S	V	V	S	L	L	I	G	I	A	N	L	G	L	N	I	G	L	H	Y	K	V	G	D	T	P	D	V	N	T	P	N
A/mallard/Alberta/213/98(H4N6)	M	N	P	N	Q	K	I	I	C	I	S	A	T	G	M	T	L	S	V	V	S	L	L	I	G	L	A	N	L	G	L	N	I	G	L	H	F	K	V	G	D	T	P	E	T	G	T	P	S
A/quail/Nanchang/4-034/2000(H4N6)	M	N	P	N	Q	K	I	I	C	I	S	A	T	G	M	T	L	S	V	V	S	L	L	I	G	I	A	N	L	G	L	N	I	G	L	H	Y	K	M	G	D	T	P	D	V	N	I	P	N
A/sanderling/Delaware/1258/1986(H6N6)	M	N	P	N	Q	K	I	I	C	I	S	A	T	G	M	I	L	S	V	V	S	L	L	I	G	L	A	N	L	G	L	N	I	G	L	H	F	K	V	R	D	T	P	E	T	E	T	P	S
A/mallard/Alberta/111/99(H4N6)	M	N	P	N	Q	K	I	I	C	I	S	A	T	G	M	T	L	S	V	V	S	L	L	I	G	L	A	N	L	G	L	N	I	G	L	H	F	K	V	G	D	T	P	E	T	G	T	P	S
A/mallard/Alberta/119/00(H4N6)	M	N	P	N	Q	K	I	I	C	I	S	A	T	G	M	T	L	S	V	V	S	L	L	I	G	L	A	N	L	G	L	N	I	G	L	H	F	K	V	G	D	T	P	E	T	G	T	P	S
A/pintail/ALB/275/1996(H4N6)	M	N	P	N	Q	K	I	I	C	I	S	A	T	G	M	T	L	S	V	V	S	L	L	I	G	L	A	N	L	G	L	N	I	G	L	H	F	K	V	G	D	T	P	E	T	G	T	P	S
A/mallard/Alberta/125/1999(H11N6)	M	N	P	N	Q	K	I	I	C	I	S	A	T	G	M	T	L	S	V	V	S	L	L	I	G	L	A	N	L	G	L	N	I	G	L	H	F	K	V	G	D	T	P	E	T	G	T	P	S
A/herring gull/Delaware/660/1988(H13N6)	M	N	P	N	Q	K	I	I	C	I	S	A	T	G	M	T	L	S	V	V	S	L	L	I	G	I	A	N	L	G	L	N	I	G	L	H	Y	K	V	G	D	T	P	D	A	N	T	P	N
N7
A/mute swan/Netherlands/1/2006(H10N7)-471AA	M	N	P	N	Q	K	L	F	A	L	S	G	V	A	I	A	L	S	I	L	N	L	L	I	G	I	S	N	V	G	L	N	V	S	L	H	L	R	E	R	G	T	K	Q	E	E	N	L	T
A/duck/Alaska/702/1991(H8N7)	M	N	P	N	Q	K	L	F	A	L	S	G	V	A	I	A	L	S	I	L	N	L	L	I	G	I	S	N	V	G	L	N	V	S	L	H	L	K	N	S	N	-	D	Q	D	K	N	W	T
A/duck/Hokkaido/W90/2007(H10N7)	M	N	P	N	Q	K	L	F	A	L	S	G	V	A	I	A	L	S	V	L	N	L	L	I	G	I	S	N	V	G	L	N	V	S	L	H	L	K	E	K	G	P	K	Q	E	E	N	S	T
A/duck/Taiwan/4201/99(H7N7)	M	N	P	N	Q	K	L	F	A	L	S	G	V	A	I	A	L	S	V	L	N	L	L	I	G	I	S	N	V	G	L	N	V	S	L	H	L	K	E	K	M	P	K	Q	E	E	N	L	T
A/mallard/Bavaria/3/2006(H10N7)	M	N	P	N	Q	K	L	F	A	L	S	G	V	A	I	A	L	S	V	L	N	L	L	I	G	I	S	N	V	G	L	N	V	S	L	H	L	K	E	K	G	P	K	Q	E	E	N	L	T
A/shorebird/DE/1346/2001(H5N7)	M	N	P	N	Q	K	L	F	A	L	S	G	V	A	I	A	L	S	I	L	N	L	L	I	G	I	S	N	V	G	L	N	V	S	L	H	L	K	G	S	N	-	D	Q	D	K	N	W	T
A/equine/Kentucky/1a/1975(H7N7)	M	N	P	N	Q	K	L	F	A	S	S	G	I	A	I	V	L	G	I	I	N	L	L	I	G	I	S	N	M	S	L	N	I	S	L	Y	S	K	G	E	S	-	H	K	N	N	N	L	T
A/duck/Chiba/13/2008(H7N7)	M	N	P	N	Q	K	L	F	A	L	S	G	V	A	I	A	L	S	V	L	N	L	L	I	G	I	S	N	V	G	L	N	V	S	L	H	L	K	E	K	G	P	K	Q	E	E	N	S	T
A/duck/Tsukuba/700/2007(H7N7)	M	N	P	N	Q	K	L	F	A	L	S	G	V	A	I	A	L	S	V	L	N	L	L	I	G	I	S	N	V	G	L	N	V	S	L	H	L	K	E	K	G	P	K	Q	E	E	N	S	T
A/mallard/Manitoba/23912/2007(H4N7)	M	N	P	N	Q	K	L	F	A	L	S	G	V	A	I	A	L	S	I	L	N	L	L	I	G	I	S	N	V	G	L	N	V	S	L	H	L	K	G	S	S	-	D	Q	D	K	N	W	T
N8
A/equine/Ohio/113461-2/2005(H3N8)-470AA	M	N	P	N	Q	K	I	M	A	I	G	F	A	S	L	G	I	L	I	I	N	V	I	L	H	V	V	S	I	I	V	T	V	L	A	L	N	N	N	R	T	D	L	N	C	K	G	T	I
A/northern shoveler/Alaska/7MP1668/2007(H3N8)	M	N	P	N	Q	K	I	I	T	I	G	S	I	S	L	G	L	V	V	L	N	I	L	L	H	I	V	S	I	T	V	T	V	L	V	L	P	G	N	G	S	N	G	G	C	N	E	T	V
A/spot-billed duck/Korea/528/2008(H6N8)	M	N	P	N	Q	K	I	I	T	I	G	S	L	S	L	G	L	V	V	L	N	I	L	L	H	I	V	S	I	I	I	T	V	L	V	L	P	G	D	G	N	N	G	S	C	S	G	T	V
A/mallard/Alberta/11527/2005(H3N8)	M	N	P	N	Q	K	I	I	T	I	G	S	V	S	L	G	L	V	V	L	N	I	L	L	H	I	V	S	I	T	I	T	V	L	V	L	P	G	N	G	N	N	G	S	C	N	E	T	V
A/blue-winged teal/Alberta/11646/2005(H3N8)	M	N	P	N	Q	K	I	I	T	I	G	S	V	S	L	G	L	V	V	L	N	I	I	L	H	I	V	S	I	T	I	T	V	L	V	L	P	G	N	G	N	N	G	S	C	N	E	T	V
A/northern pintail/Alberta/11701/2005(H3N8)	M	N	P	N	Q	K	I	I	T	V	G	S	V	S	L	G	L	V	V	L	N	I	L	L	H	I	V	S	I	T	V	T	V	L	V	L	P	G	N	G	N	N	G	N	C	N	E	T	V
A/green-winged teal/Ohio/960/2002(H3N8)	M	N	P	N	Q	K	I	I	T	I	G	S	V	S	L	G	L	V	V	L	N	I	L	L	H	I	V	S	I	T	I	T	V	L	V	L	P	G	N	G	N	N	G	S	C	N	E	T	V
A/avian/New York/Sg-00418/2003(H5N8)	-	-	-	-	-	-	-	I	T	I	G	S	V	S	L	G	L	V	V	L	N	V	L	L	H	I	V	N	I	I	I	T	V	L	V	L	P	G	N	G	N	N	G	R	C	N	E	T	V
A/mallard/Jiangxi/6285/2004(H6N8)	M	N	P	N	Q	K	I	I	T	I	G	S	I	S	L	G	L	V	V	F	N	V	L	L	H	V	V	S	I	I	V	T	V	L	V	L	G	K	G	G	D	N	G	V	C	N	E	T	I
A/duck/Hunan/3748/2004(H6N8)	M	N	P	N	Q	K	I	I	T	I	G	S	I	S	L	G	L	V	V	F	N	V	L	L	H	V	V	S	I	I	V	T	V	L	I	L	G	R	G	G	S	N	G	I	C	N	E	T	V
N9
A/sharp-tailed sandpiper/Australia/6/2004(H11N9)-470AA	M	N	P	N	Q	K	I	L	C	T	S	A	T	A	I	V	I	G	T	I	A	V	L	I	G	V	A	N	L	G	L	N	I	G	L	H	L	K	P	S	C	N	C	S	H	S	Q	P	E
A/teal/Alberta/16/97(H2N9)	M	N	P	N	Q	K	I	L	C	T	S	A	T	A	I	V	I	G	T	I	A	V	L	I	G	I	A	N	L	G	L	N	I	G	L	H	L	K	P	D	C	N	C	S	H	S	Q	P	E
A/pintail/Alberta/293/1977(H2N9)	M	N	P	N	Q	K	I	L	C	T	S	A	T	A	I	V	I	G	T	I	A	V	L	I	G	I	A	N	L	G	L	N	I	G	L	H	L	K	P	S	C	N	C	S	H	S	Q	P	E
A/laughing gull/New Jersey/75/1985(H2N9)	M	N	P	N	Q	K	I	L	F	A	S	A	T	A	I	V	I	G	T	I	A	V	L	I	G	I	V	N	L	G	L	N	I	G	L	H	L	K	P	S	C	N	C	S	R	S	Q	P	E
A/blue-winged teal/Alberta/16/1997(H2N9)	M	N	P	N	Q	K	I	L	C	T	S	A	T	A	I	V	I	G	T	I	A	V	L	I	G	I	A	N	L	G	L	N	I	G	L	H	L	K	P	D	C	N	C	S	H	S	Q	P	E
A/duck/Hong Kong/278/1978(H2N9)	M	N	P	N	Q	K	I	L	C	T	S	A	T	A	I	A	I	G	T	I	A	V	L	I	G	I	A	N	L	G	L	N	I	G	L	H	L	K	P	S	C	N	C	S	N	S	P	S	E
A/red-necked stint/Australia/5745/1981(H12N9)	M	N	P	N	Q	K	I	L	C	T	S	A	T	A	I	V	I	G	T	I	A	V	L	I	G	I	A	N	L	G	L	N	I	G	L	H	L	K	P	S	C	N	C	S	P	S	Q	P	E
A/shoveler/Netherlands/19/1999(H11N9)	M	N	P	N	Q	K	I	L	C	T	S	A	T	A	I	A	I	G	T	I	A	V	L	I	G	I	A	N	L	G	L	N	I	G	L	H	L	R	P	S	C	N	C	T	N	S	P	T	E
A/mallard/Alberta/294/1977(H11N9)	M	N	P	N	Q	K	I	L	C	T	S	A	T	A	I	V	I	G	T	I	A	V	L	I	G	I	A	N	L	G	L	N	I	G	L	H	L	K	P	S	C	N	C	S	H	S	Q	P	E
A/shorebird/DE/68/2004(H13N9)	M	N	P	N	Q	K	I	L	C	T	S	A	T	A	I	V	I	G	T	I	A	V	L	I	G	I	A	N	L	G	L	N	I	G	L	H	L	K	P	N	C	N	C	S	H	S	Q	P	E
N10
A/little yellow-shouldered bat/Guatemala/153/2009(H17N10)-442AA	M	S	I	N	G	T	T	C	L	L	T	L	S	L	I	L	N	V	I	M	I	G	L	Q	I	L	M	P	F	I	L	L	W	T	N	S	P	P	P	E	I	S
A/little yellow-shouldered bat/Guatemala/164/2009(H17N10)	M	S	I	N	G	T	T	C	L	L	T	L	S	L	I	L	N	V	I	M	I	G	L	Q	I	L	M	P	F	I	L	L	W	T	N	S	P	P	P	E	I	S
A/little yellow-shouldered bat/Guatemala/060/2010(H17N10)	M	S	I	N	G	T	T	C	L	L	T	L	S	L	I	L	N	I	V	M	I	G	L	Q	V	L	M	P	F	V	L	L	W	T	N	S	P	P	P	E	I	Y
[truncated: 556 more columns]
